# Supplementary material for: Photoelectric effect of hybrid ultraviolet-sensitized phototransistors from an n-type organic semiconductor and an all-inorganic perovskite quantum dot photosensitizer
Source: Royal Society of Chemistry journal article supplement (doi:10.1039/d1nr07084c), 2021-01-01
Supplement: d1nr07084c1.pdf [file d1nr07084c1.pdf]

## Electronic Supplementary Information

### Photoelectric Effect of Hybrid Ultraviolet-Sensitized Phototransistors from N-type Organic Semiconductors and All-Inorganic Perovskite Quantum Dots Photosensitizer

*Shao-Huan Hong,<sup>‡a</sup> Shakil N. Afraj,<sup>‡b</sup> Ping-Yu Huang,<sup>b</sup> Yi-Zi Yeh,<sup>b</sup> Shih-Huang Tung,<sup>c</sup> Ming-Chou Chen,<sup>b</sup> and Cheng-Liang Liu<sup>\*d</sup>*

- a. Department of Chemical and Materials Engineering, National Central University, Taoyuan 32001, Taiwan.
- b. Department of Chemistry, National Central University, Taoyuan 32001, Taiwan.
- c. Institute of Polymer Science and Engineering, National Taiwan University, Taipei 10617, Taiwan.
- d. Department of Material Science and Engineering, National Taiwan University, Taipei 10617, Taiwan. E-mail: liucl@ntu.edu.tw

<sup>‡</sup> These Authors Contributed equally to this work.

*Materials:* All chemicals and anhydrous solvents were used as received without further purification.

*Characterization:* Morphology and electron diffraction of CsPbBr<sub>3</sub> QDs were evaluated using a JEOL JEM-2100 transmission electron microscope (TEM), operating at an accelerating voltage of 200 kV. X-ray diffraction (XRD) patterns of CsPbBr<sub>3</sub> QDs samples were determined on a Bruker Advance D8 diffractometer equipped with Cu K $\alpha$  radiation ( $\lambda = 1.5416 \text{ \AA}$ ). X-ray photoelectron spectroscopies (XPS; Thermo VG-Scientific Sigma Probe) were used to probe the elemental composition of QDs. The UV-Vis spectra were obtained on a HITACHI U-4100 spectrometer. Thin film photoluminescence (PL) spectra were measured using Raman Spectrometer and Picosecond Pulse Laser System (Uni-RAM MGL-FN-532). The ionization energy was determined from the photoelectron emission yield measured by a Photon Electron Spectroscopy in Air (PESA) system (RIKEN KEIKI AC-2) operating at room temperature. Surface morphologies of the blend thin films were determined by an atomic force microscopy (Seiko SPA-400) under ambient condition. A time-of-flight secondary ion mass spectrometry (TOF-SIMS) spectrometer (ION-TOF, TOF-SIMS V) was utilized to depth-profile the blend films. Grazing incidence X-ray diffraction (GIXRD) measurements were performed at beamline TLS 13A1/17A1/23A1 at National Synchrotron Radiation Research Center (NSRRC) of Taiwan.

**Table S1.** Key figures of merit of perovskite QD-containing hybrid phototransistor.

| Hybrid Materials                                                         | Photoactive layer | $R$ [ $A W^{-1}$ ] | $S$               | $D$ [Jones]           | Ref       |
|--------------------------------------------------------------------------|-------------------|--------------------|-------------------|-----------------------|-----------|
| CsPbBr <sub>3</sub> QD/DNTT                                              | bilayer           | $1.7 \times 10^4$  | $8.1 \times 10^4$ | $2 \times 10^{14}$    | 1         |
| DPP-DTT/CsPbI <sub>3</sub> QD                                            | bilayer           | 110                | $6 \times 10^3$   | $2.9 \times 10^{13}$  | 2         |
| PQT-12:CsPbBr <sub>3</sub> QD                                            | blend             | 22.18              | -                 | -                     | 3         |
| C8-BTBT:CH <sub>3</sub> NH <sub>3</sub> PbI <sub>3</sub> NP <sup>a</sup> | blend             | $1.72 \times 10^4$ | -                 | $2.09 \times 10^{12}$ | 4         |
| DTTQ:CsPbBr <sub>3</sub> QD                                              | blend             | $7.1 \times 10^5$  | $1.8 \times 10^4$ | $3.6 \times 10^{13}$  | this work |

<sup>a</sup>(NP: nanoparticle)

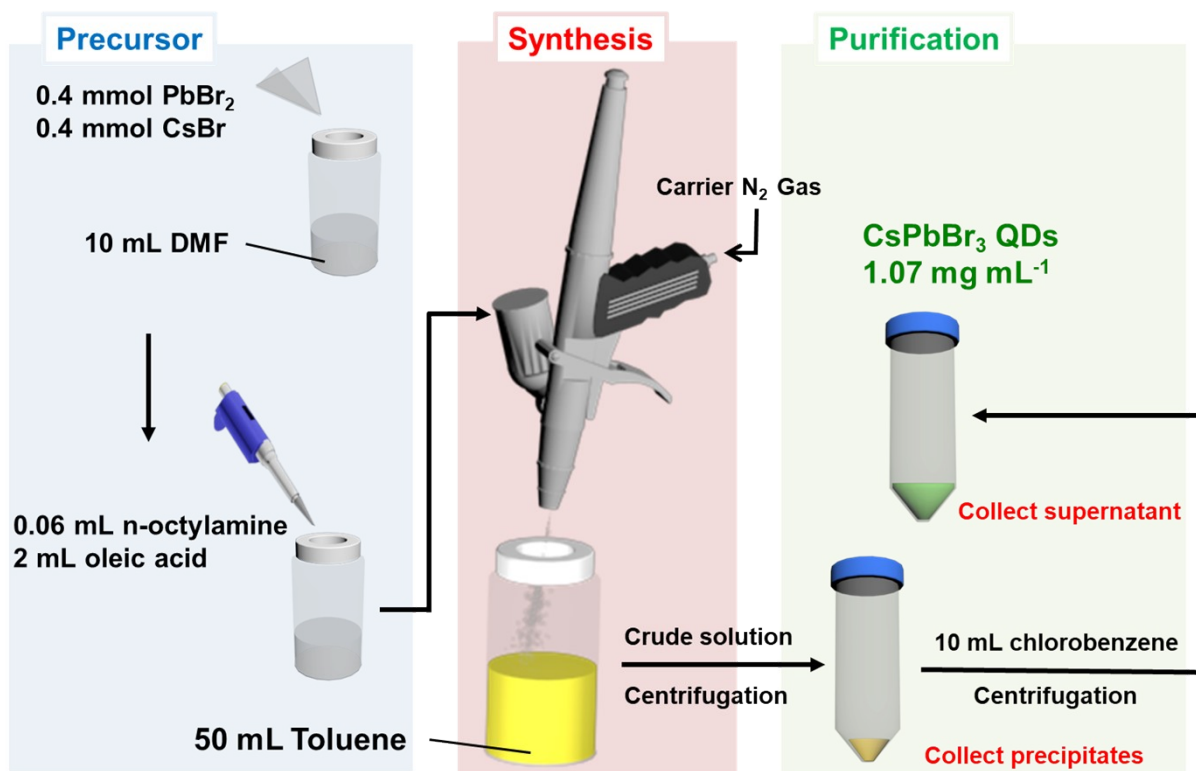

Fig. S1 The schematics of CsPbBr<sub>3</sub> QDs preparation.

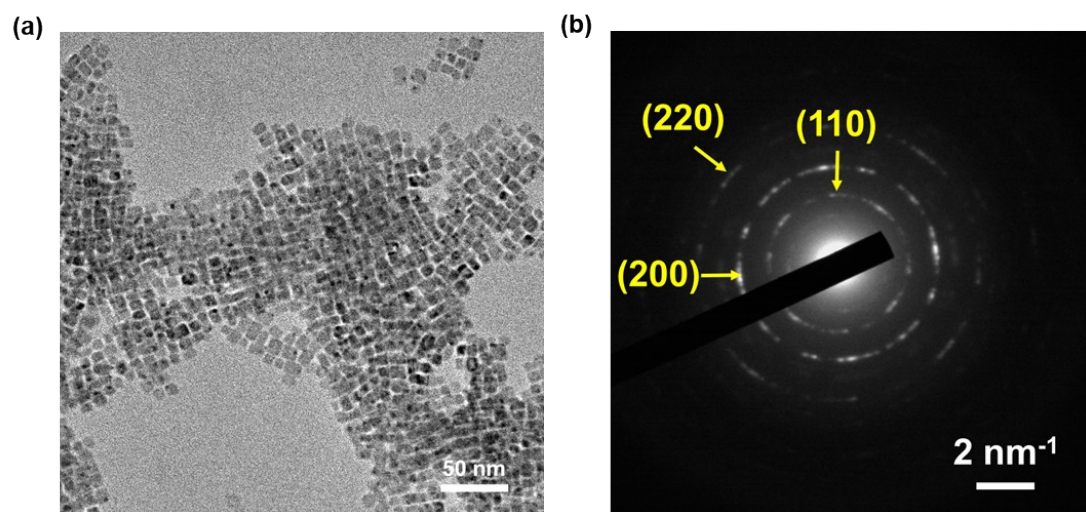

**Fig. S2** Characterization of CsPbBr<sub>3</sub> QDs: (a) TEM image and (b) SAED patterns.

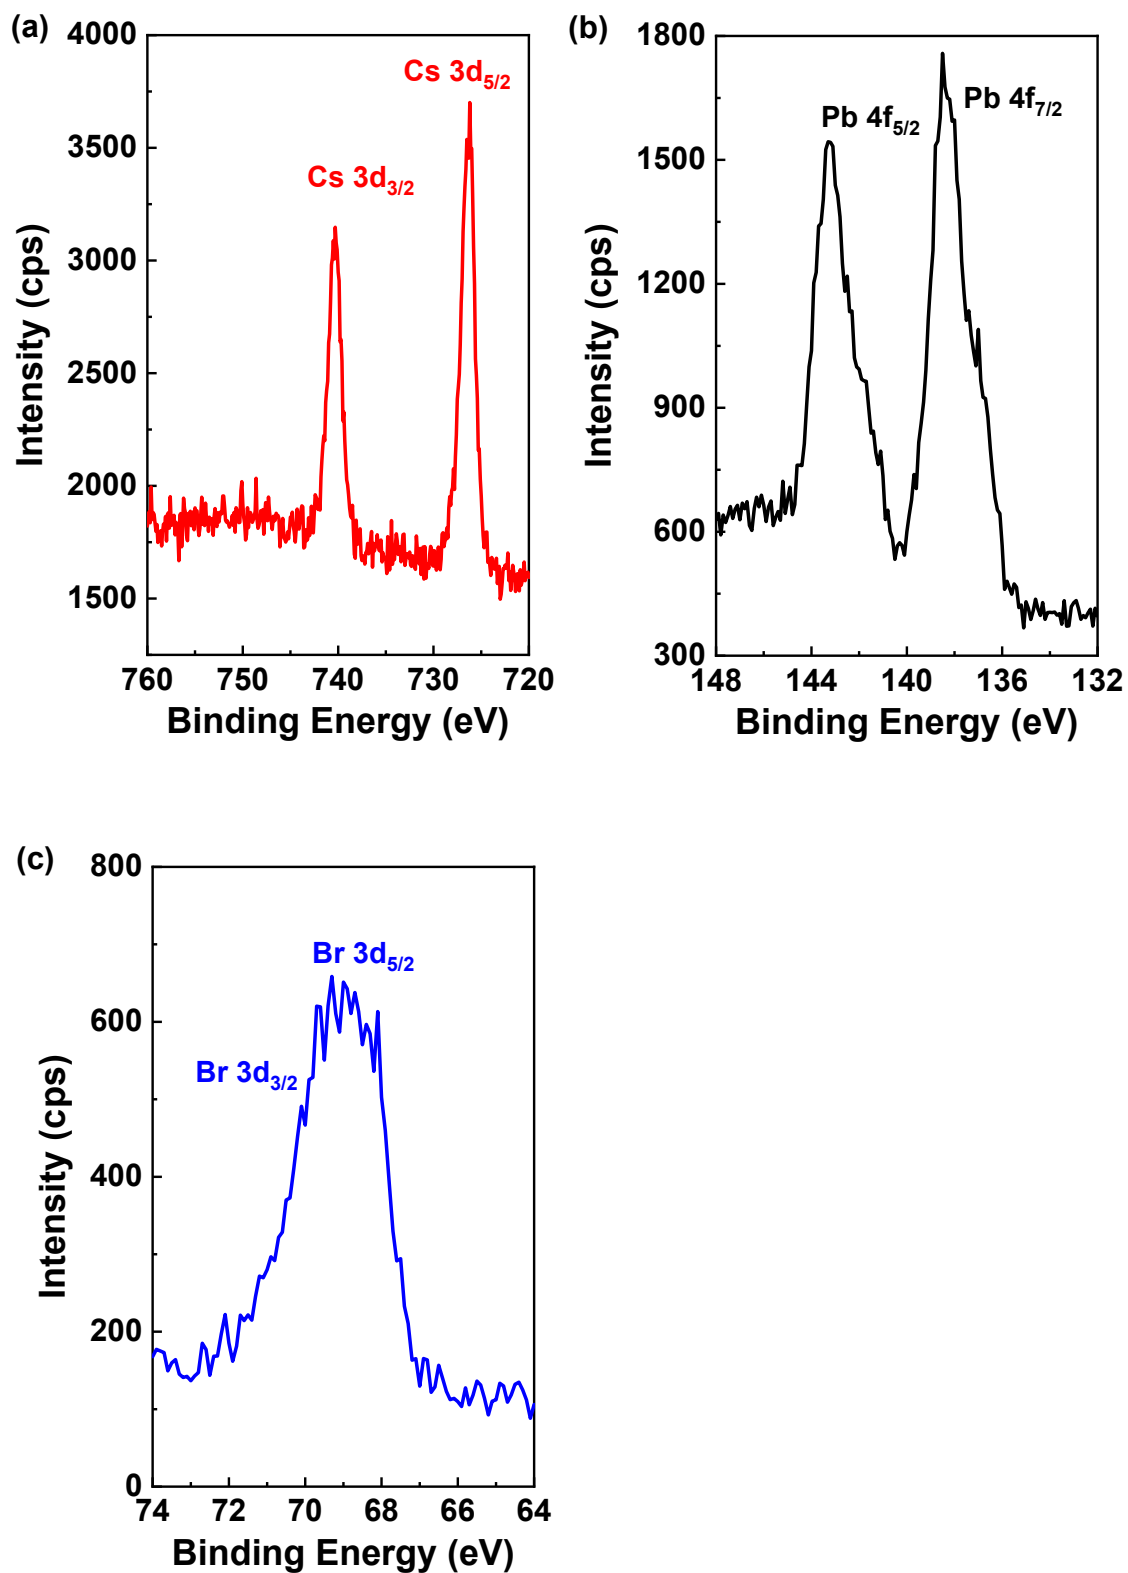

**Fig. S3** High resolution of XPS spectra for (a) Cs 3d, (b) Pb 4f, and (c) Br 3d of CsPbBr<sub>3</sub> perovskite QDs.

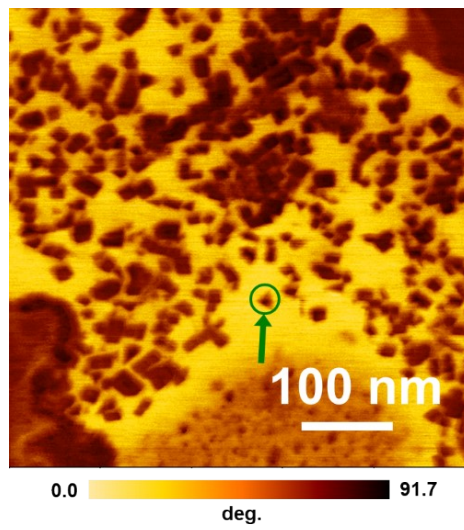

**Fig. S4** AFM phase image of solution-sheared DTTQ:QD (3:7) film.

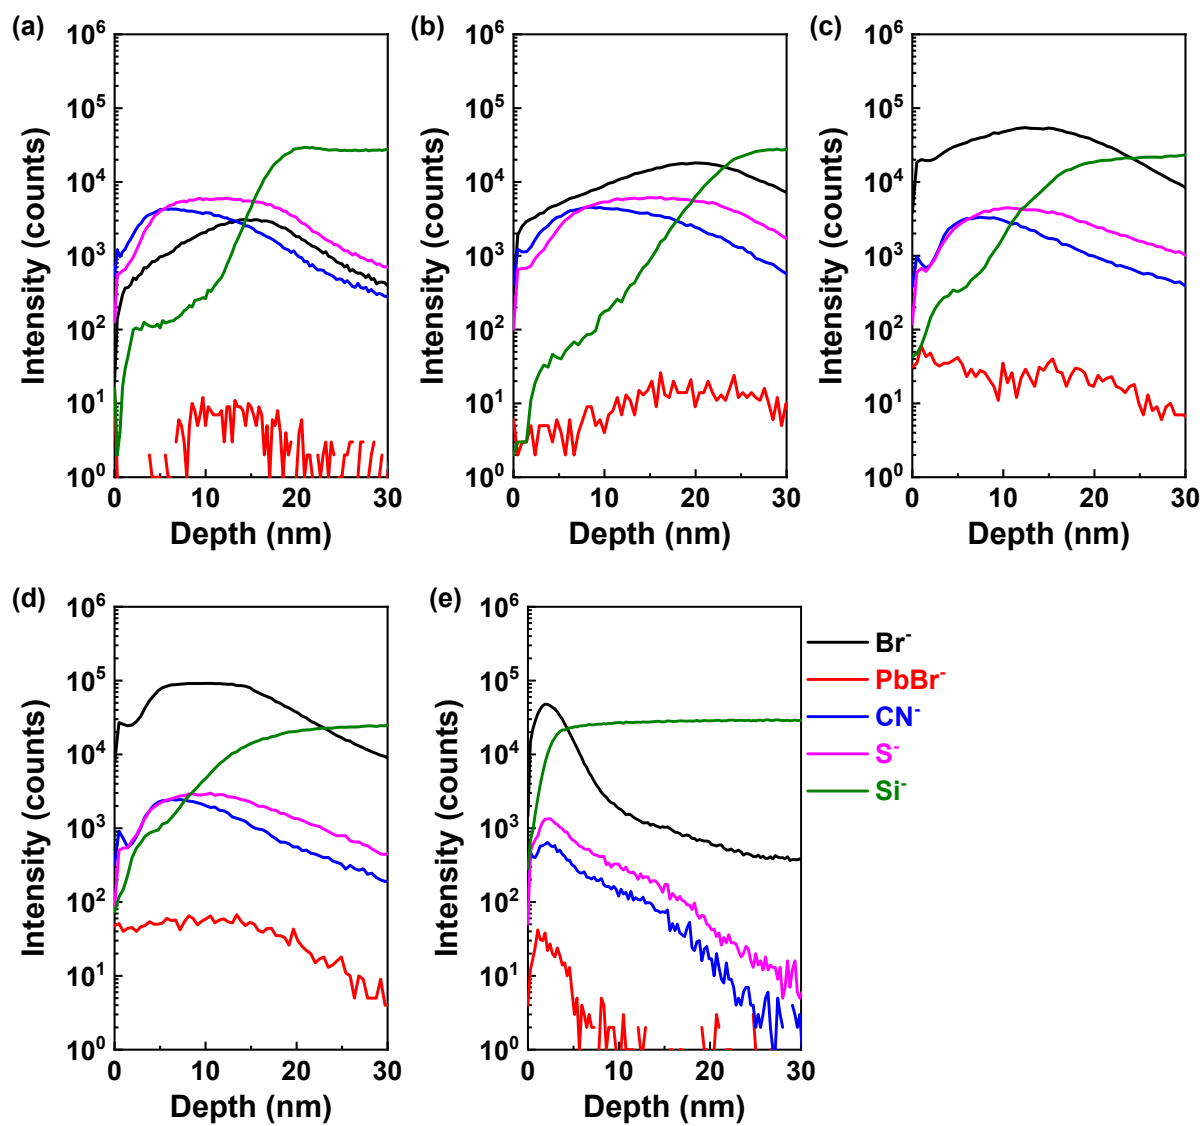

**Fig. S5** TOF-SIMS depth profile of solution-sheared DTTQ:QD (a) (9:1), (b) (7:3), (c) (5:5), (d) (3:7), and (e) (1:9) films.



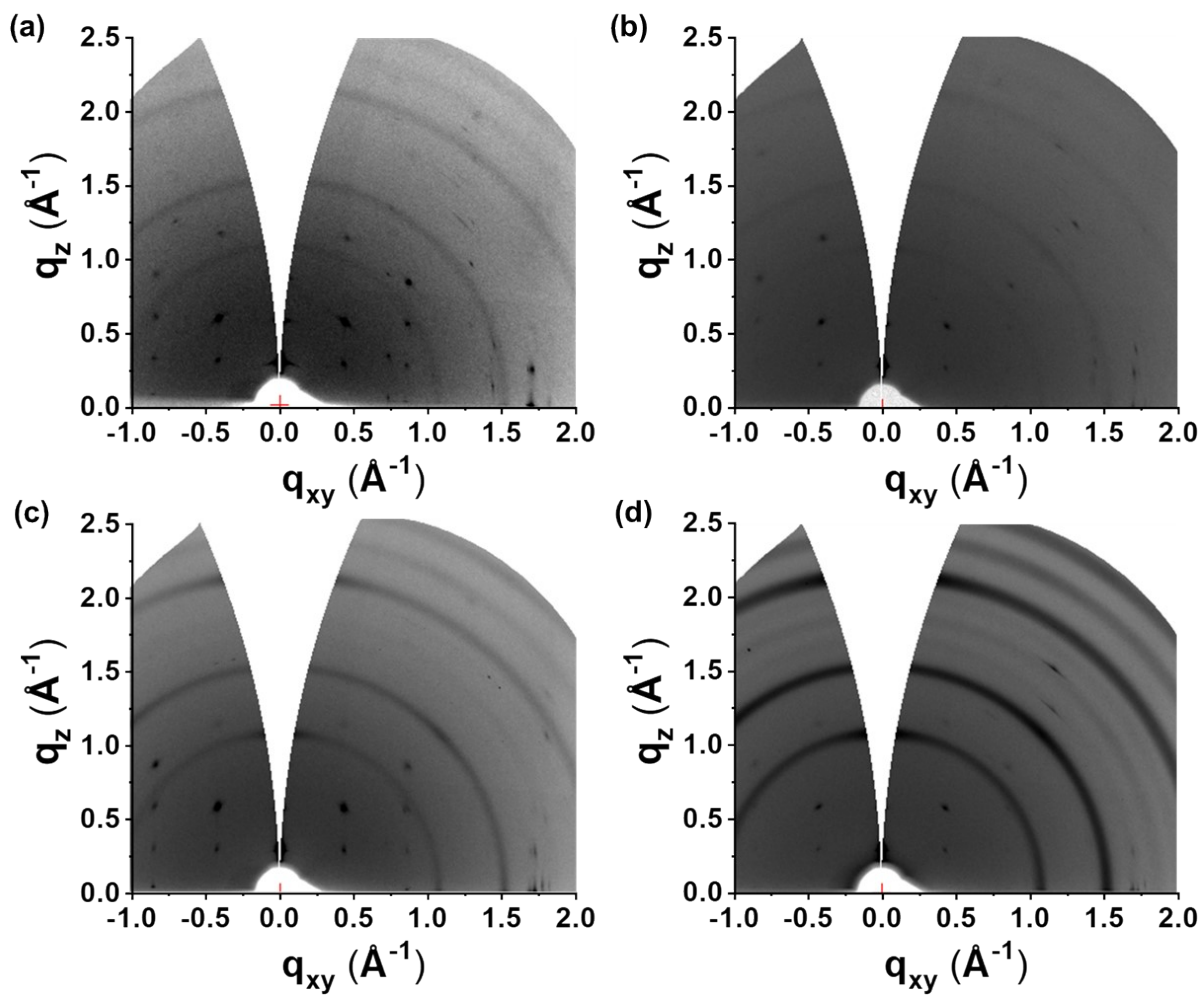

**Fig. S6** 2D GIXRD profile of solution-sheared DTTQ:QD (a) (9:1), (b) (7:3), (c) (5:5), and (d) (1:9) films.

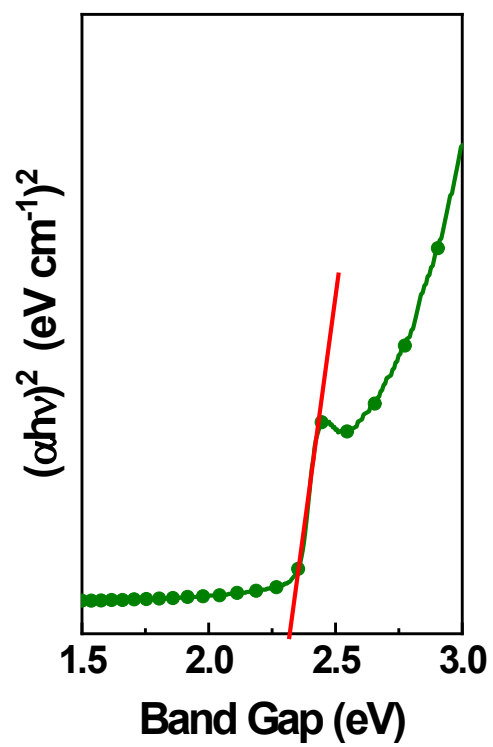

Fig. S7 Tauc plot for bandgap estimation of CsPbBr<sub>3</sub> QDs film.

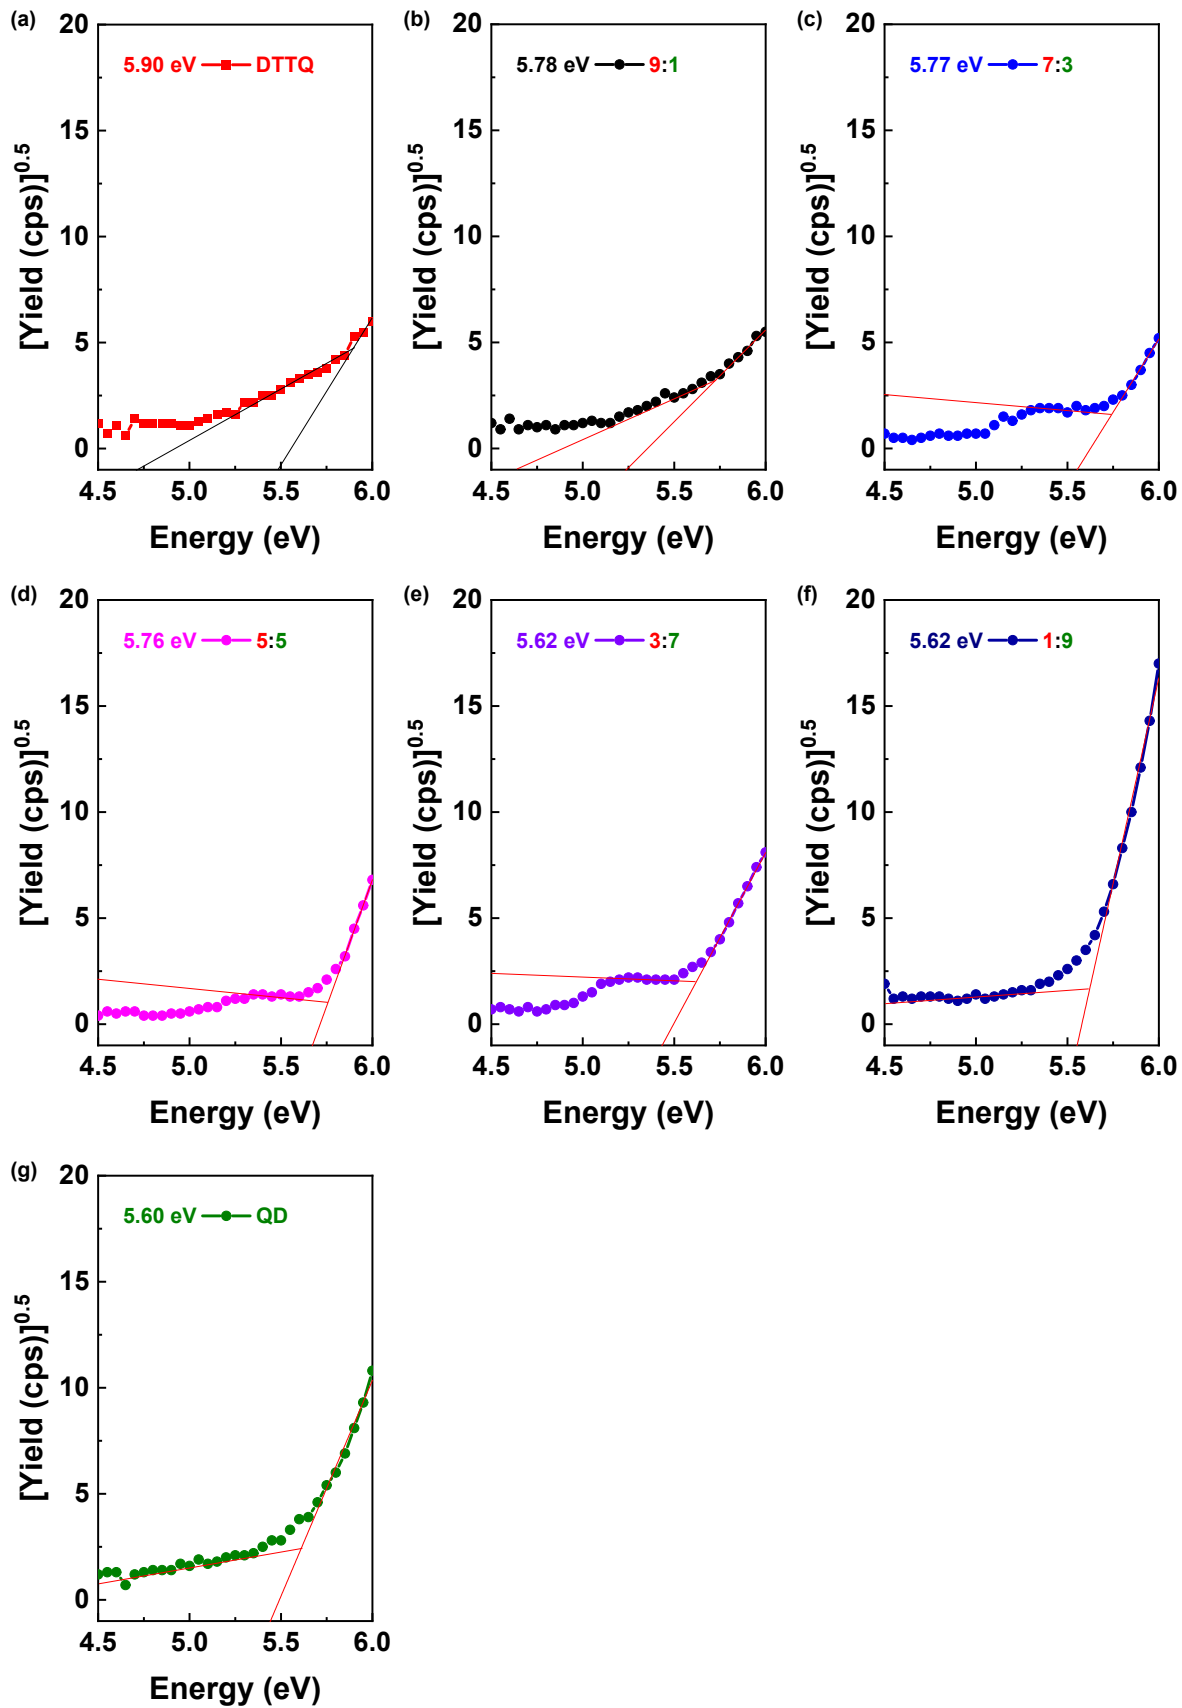

**Fig. S8** PESA studies carried out for HOMO of solution-sheared DTTQ (a), and  $E_v$  of CsPbBr<sub>3</sub> QDs (g) and those of DTTQ:QD (b) (9:1), (c) (7:3), (d) (5:5), (e) (3:7), and (f) (1:9) films. A small hump near 5.0 eV can be observed since the work function of SiO<sub>2</sub> is around 5.0 eV.

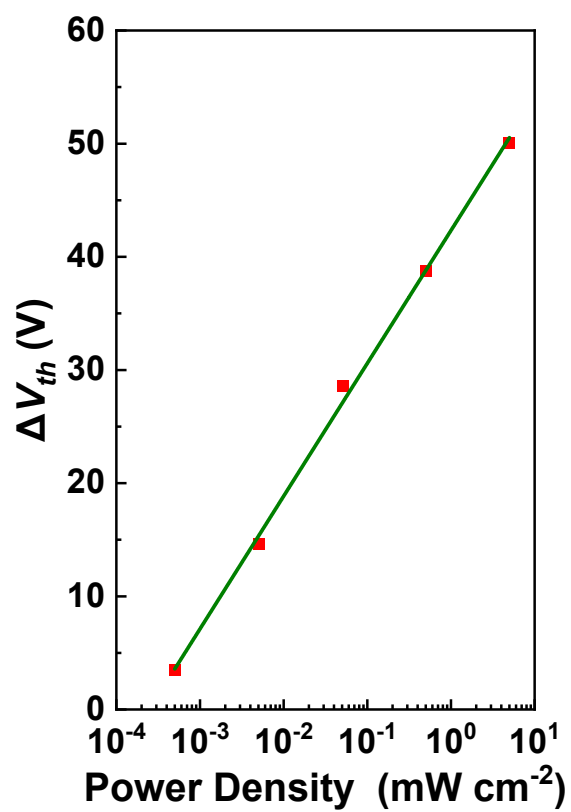

**Fig. S9** Shift in the threshold voltage ( $\Delta V_{th}$ ) of DTTQ:QD (3:7) hybrid phototransistor as a function of illumination light intensity.

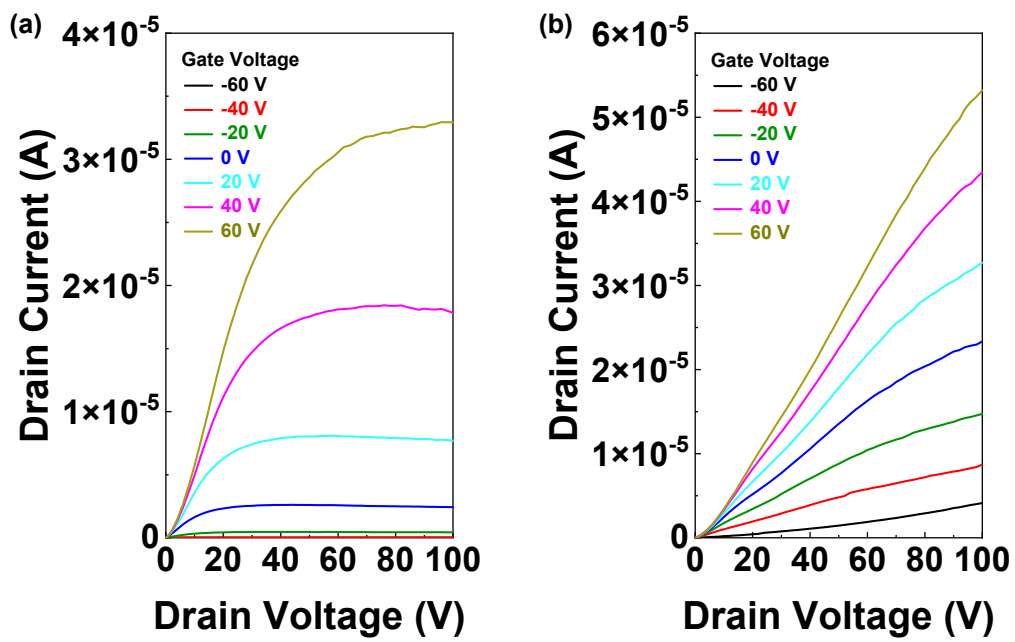

**Fig. S10** Output characteristics of DTTQ:QD (3:7) hybrid phototransistor (a) in dark and (b) under illumination.

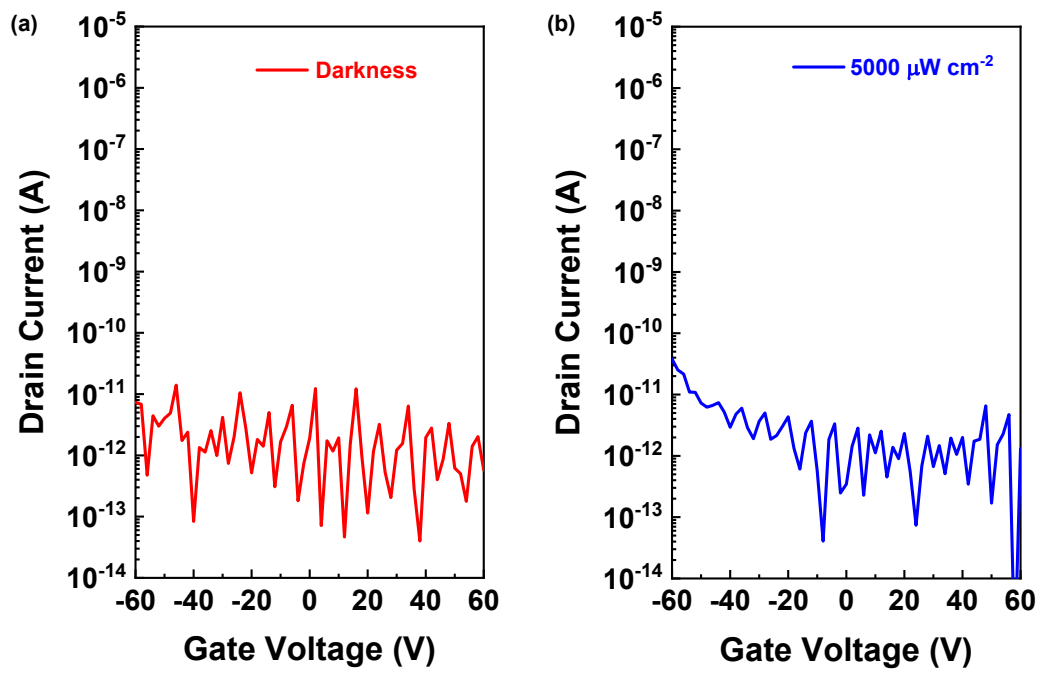

Fig. S11 Transfer characteristics of QD phototransistor (a) in dark and (b) under illumination.

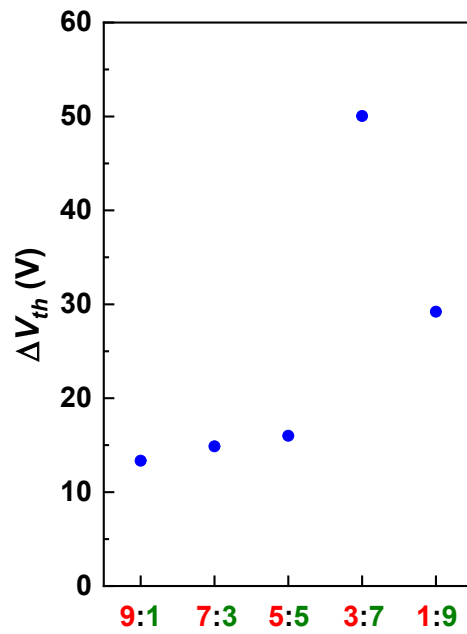

**Fig. S12** Shift in the threshold voltage ( $\Delta V_{th}$ ) of DTTQ:QDs (9:1), (7:3), (5:5), (3:7) and (1:9) phototransistor between the dark and illuminated (light intensity of  $5000 \mu\text{W cm}^{-2}$ ) condition.



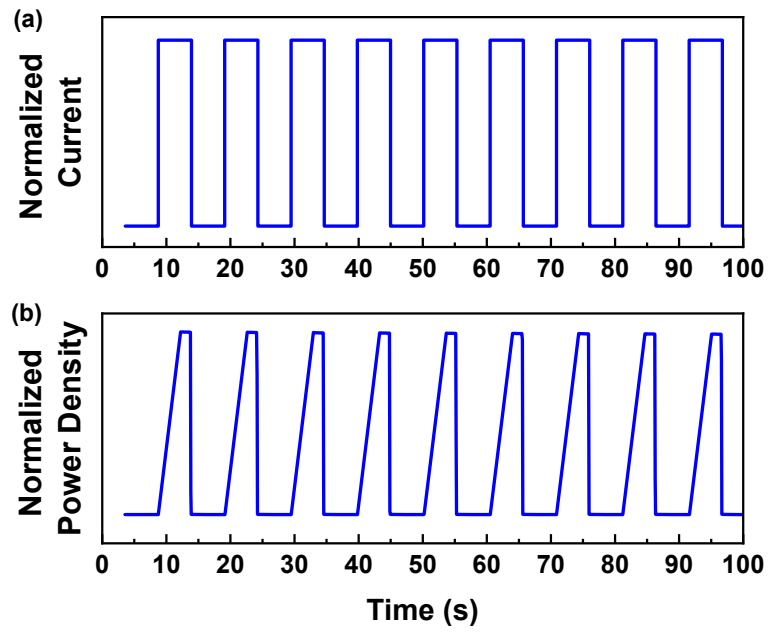

**Fig. S13** Actual response of (b) the incident light pulse (normalized), as powered by (a) electrical pulse.

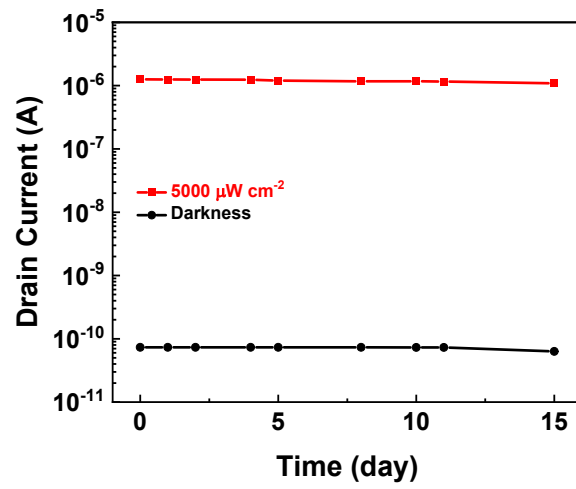

**Fig. S14** Long term stability test of DTTQ:QD (3:7) hybrid phototransistor: The  $I_{illum}$  and  $I_{dark}$  as a function of time.

## Reference

1. Y. Chen, Y. Chu, X. Wu, W. Ou-Yang and J. Huang, *Adv. Mater.*, 2017, **29**, 1704062.
2. C. Zou, Y. Xi, C.-Y. Huang, E. G. Keeler, T. Feng, S. Zhu, L. D. Pozzo and L. Y. Lin, *Adv. Opt. Mater.*, 2018, **6**, 1800324.
3. K. Wang, S. Dai, Y. Zhao, Y. Wang, C. Liu and J. Huang, *Small*, 2019, **15**, 1900010.
4. X. Xu, W. Deng, X. Zhang, L. Huang, W. Wang, R. Jia, D. Wu, X. Zhang, J. Jie and S.-T. Lee, *ACS Nano*, 2019, **13**, 5910-5919.
